# Supplementary material
Source: publisher figshare collection journal article supplement (https://acs.figshare.com/ndownloader/files/3750439)
Supplement: Supplementary file 1 [file 3750439]

## **Supporting information**

Manuscript: Pharmacological targeting of AMP-activated protein kinase and opportunities for computer-aided drug design

Authors: Marie Miglianico, Gerry A.F. Nicolaes, Dietbert Neumann

### **Table of content:**

Supp. Table 1: List of all available AMPK or AMPK yeast ortholog structures.

**Supp. Table 1: List of all available AMPK or AMPK yeast ortholog structures.**

| PDB ID | Organism                  | Subunit                                                 | Domain     | Ligand     | Method | Resolution (Å) | Deposition Year | Publication                       | Remark         |
|--------|---------------------------|---------------------------------------------------------|------------|------------|--------|----------------|-----------------|-----------------------------------|----------------|
| 1Z0M   | Rattus norvegicus         | B1                                                      | CBM        | BCD        | X-ray  | 1,49           | 2005            | Polekhina et al. Structure, 2005  |                |
| 1Z0N   | Rattus norvegicus         | B1                                                      | CBM        | BCD        | X-ray  | 1,49           | 2005            | Polekhina et al. Structure, 2005  | Mutation L105M |
| 2F15   | Homo sapiens              | B2                                                      | CBM        | BCD        | X-ray  | 2              | 2005            | X                                 |                |
| 2FH9   | Saccharomyces cerevisiae  | Snf1 kinase (A)                                         | KD         |            | X-ray  | 2,8            | 2005            | Nayak et al. Structure, 2006      |                |
| 2H6D   | Homo sapiens              | A2                                                      | KD         |            | X-ray  | 1,85           | 2005            | Littler et al. Acta Cryst F, 2010 |                |
| 2LTU   | Homo sapiens              | A2                                                      | AID        |            | NMR    | X              | 2006            | X                                 |                |
| 2LU3   | Rattus norvegicus         | B2                                                      | CBM        |            | NMR    | X              | 2012            | X                                 |                |
| 2LU4   | Rattus norvegicus         | B2                                                      | CBM        |            | NMR    | X              | 2012            | X                                 |                |
| 2OOX   | Schizosaccharomyces pombe | SNF1-like protein kinase ssp2 (A)                       | B-ID       |            | X-ray  | 2,6            | 2007            | Townley & Shapiro. Science, 2007  |                |
|        |                           | SPCC1919.03c protein (B)                                | AG-ID      |            |        |                |                 |                                   |                |
|        |                           | Hypothetical protein C1556.08c in chromosome I (G)      | All        | AMP        |        |                |                 |                                   |                |
| 2OOY   | Schizosaccharomyces pombe | SNF1-like protein kinase ssp2 (A)                       | B-ID       |            | X-ray  | 2,88           | 2007            | Townley & Shapiro. Science, 2007  |                |
|        |                           | SPCC1919.03c protein (B)                                | AG-ID      |            |        |                |                 |                                   |                |
|        |                           | Hypothetical protein C1556.08c in chromosome I (G)      | All        | ATP        |        |                |                 |                                   |                |
| 2QLV   | Saccharomyces cerevisiae  | Carbon catabolite derepressing protein kinase (SNF1, A) | B-ID       |            | X-ray  | 2,6            | 2007            | Amodeo et al. Nature, 2007        |                |
|        |                           | Protein SIP2 (B)                                        | CBM, AG-ID |            |        |                |                 |                                   |                |
|        |                           | Nuclear protein SNF4 (G)                                | All        |            |        |                |                 |                                   |                |
| 2QR1   | Schizosaccharomyces pombe | SNF1-like protein kinase ssp2 (A)                       | B-ID       |            | X-ray  | 2,7            | 2007            | Jin et al. Structure, 2007        |                |
|        |                           | SPCC1919.03c protein (B)                                | AG-ID      |            |        |                |                 |                                   |                |
|        |                           | Protein C1556.08c (G)                                   | All        | ADP        |        |                |                 |                                   |                |
| 2QRC   | Schizosaccharomyces pombe | SNF1-like protein kinase ssp2 (A)                       | B-ID       |            | X-ray  | 2,7            | 2007            | Jin et al. Structure, 2007        |                |
|        |                           | SPCC1919.03c protein (B)                                | AG-ID      |            |        |                |                 |                                   |                |
|        |                           | Protein C1556.08c (G)                                   | All        | ADP, AMP   |        |                |                 |                                   |                |
| 2QRD   | Schizosaccharomyces pombe | SNF1-like protein kinase ssp2 (A)                       | B-ID       |            | X-ray  | 2,41           | 2007            | Jin et al. Structure, 2007        |                |
|        |                           | SPCC1919.03c protein (B)                                | AG-ID      |            |        |                |                 |                                   |                |
|        |                           | Protein C1556.08c (G)                                   | All        | ATP, ADP   |        |                |                 |                                   |                |
| 2QRE   | Schizosaccharomyces pombe | SNF1-like protein kinase ssp2 (A)                       | B-ID       |            | X-ray  | 3,01           | 2007            | Jin et al. Structure, 2007        |                |
|        |                           | SPCC1919.03c protein (B)                                | AG-ID      |            |        |                |                 |                                   |                |
|        |                           | Protein C1556.08c (G)                                   | All        | ZMP        |        |                |                 |                                   |                |
| 2UV4   | Homo sapiens              | G1                                                      | CBS3, CBS4 | AMP        | X-ray  | 1,33           | 2007            | Day et al. Acta Cryst D, 2007     |                |
| 2UV5   | Homo sapiens              | G1                                                      | CBS3, CBS4 | ZMP        | X-ray  | 1,69           | 2007            | Day et al. Acta Cryst D, 2007     |                |
| 2UV6   | Homo sapiens              | G1                                                      | CBS3, CBS4 | AMP        | X-ray  | 2              | 2007            | Day et al. Acta Cryst D, 2007     |                |
| 2UV7   | Homo sapiens              | G1                                                      | CBS3, CBS4 | AMP        | X-ray  | 2              | 2007            | Day et al. Acta Cryst D, 2007     |                |
| 2V8Q   | Rattus norvegicus         | A1                                                      | B-ID       |            | X-ray  | 2,1            | 2007            | Xiao et al. Nature, 2007          |                |
|        | Homo sapiens              | B2                                                      | AG-ID      |            |        |                |                 |                                   |                |
|        | Rattus norvegicus         | G1                                                      | All        | AMP        |        |                |                 |                                   |                |
| 2V92   | Rattus norvegicus         | A1                                                      | B-ID       |            | X-ray  | 2,4            | 2007            | Xiao et al. Nature, 2007          |                |
|        | Homo sapiens              | B2                                                      | AG-ID      |            |        |                |                 |                                   |                |
|        | Rattus norvegicus         | G1                                                      | All        | AMP, ATP   |        |                |                 |                                   |                |
| 2V9J   | Rattus norvegicus         | A1                                                      | B-ID       |            | X-ray  | 2,53           | 2007            | Xiao et al. Nature, 2007          |                |
|        | Homo sapiens              | B2                                                      | AG-ID      |            |        |                |                 |                                   |                |
|        | Rattus norvegicus         | G1                                                      | All        | AMP, MgATP |        |                |                 |                                   |                |

**Supp. Table 1 (continuation): List of all available AMPK or AMPK yeast ortholog structures.**

| PDB ID | Organism                             | Subunit                                                 | Domain     | Ligand                 | Method | Resolution (Å) | Deposition Year | Author                                | Remark         |
|--------|--------------------------------------|---------------------------------------------------------|------------|------------------------|--------|----------------|-----------------|---------------------------------------|----------------|
| 2Y8L   | Rattus norvegicus                    | A1                                                      | B-ID       |                        | X-ray  | 2,5            | 2011            | Xiao et al. Nature, 2011              |                |
|        | Homo sapiens                         | B2                                                      | AG-ID      |                        |        |                |                 |                                       |                |
|        | Rattus norvegicus                    | G1                                                      | All        | ADP, AMP               |        |                |                 |                                       |                |
| 2Y8Q   | Rattus norvegicus                    | A1                                                      | B-ID       |                        | X-ray  | 2,8            | 2011            | Xiao et al. Nature, 2011              |                |
|        | Homo sapiens                         | B2                                                      | AG-ID      |                        |        |                |                 |                                       |                |
|        | Rattus norvegicus                    | G1                                                      | All        | ADP, AMP               |        |                |                 |                                       |                |
| 2YA3   | Rattus norvegicus                    | A1                                                      | B-ID       |                        | X-ray  | 2,51           | 2011            | Xiao et al. Nature, 2011              |                |
|        | Homo sapiens                         | B2                                                      | AG-ID      |                        |        |                |                 |                                       |                |
|        | Rattus norvegicus                    | G1                                                      | All        | Coumarin ADP           |        |                |                 |                                       |                |
| 2YZA   | Homo sapiens                         | A2                                                      | KD         |                        | X-ray  | 3,02           | 2007            | Handa et al. Acta Cryst D, 2011       | Mutation T172D |
| 3AQV   | Homo sapiens                         | A2                                                      | KD         | Compound C             | X-ray  | 2,08           | 2010            | Handa et al. Acta Cryst D, 2011       | Mutation T172D |
| 3DAE   | Saccharomyces cerevisiae             | Carbon catabolite-derepressing protein kinase (SNF1, A) | KD         |                        | X-ray  | 2,9            | 2008            | Chen et al. Nature, 2009              |                |
| 3H4J   | Schizosaccharomyces pombe            | SNF1-like protein kinase ssp2 (A)                       | KD-AID     |                        | X-ray  | 2,8            | 2009            | Chen et al. Nature, 2009              |                |
| 3MN3   | Saccharomyces cerevisiae             | Carbon catabolite-derepressing protein kinase (SNF1, A) | KD         |                        | X-ray  | 2,38           | 2010            | Rudolph et al. Acta Cryst F, 2010     |                |
| 3T4N   | Saccharomyces cerevisiae             | Carbon catabolite-derepressing protein kinase (SNF1, A) | B-ID       |                        | X-ray  | 2,3            | 2011            | Mayer et al. Cell Metab, 2011         |                |
|        |                                      | SNF1 protein kinase subunit beta-2                      | AG-ID      |                        |        |                |                 |                                       |                |
|        |                                      | Nuclear protein SNF4 (G)                                | All        | ADP                    |        |                |                 |                                       |                |
| 3TDH   | Saccharomyces cerevisiae             | Carbon catabolite-derepressing protein kinase (SNF1, A) | B-ID       |                        | X-ray  | 2,3            | 2011            | Mayer et al. Cell Metab, 2011         |                |
|        |                                      | SNF1 protein kinase subunit beta-2                      | AG-ID      |                        |        |                |                 |                                       |                |
|        |                                      | Nuclear protein SNF4 (G)                                | All        | AMP                    |        |                |                 |                                       |                |
| 3TE5   | Saccharomyces cerevisiae             | Carbon catabolite-derepressing protein kinase           | B-ID       |                        | X-ray  | 2,5            | 2011            | Mayer et al. Cell Metab, 2011         |                |
|        |                                      | SNF1 protein kinase subunit beta-2                      | AG-ID      |                        |        |                |                 |                                       |                |
|        |                                      | Nuclear protein SNF4                                    | All        | NADH                   |        |                |                 |                                       |                |
| 4CFE   | Homo sapiens                         | A2                                                      | All        | 991, Staurosporine     | X-ray  | 3,02           | 2013            | Xiao et al. Nat Comm, 2013            |                |
|        |                                      | B1                                                      | CBM, AG-ID |                        |        |                |                 |                                       |                |
|        |                                      | G1                                                      | All        | AMP                    |        |                |                 |                                       |                |
| 4CFF   | Homo sapiens                         | A2                                                      | All        | A769662, Staurosporine | X-ray  | 3,92           | 2013            | Xiao et al. Nat Comm, 2013            |                |
|        |                                      | B1                                                      | CBM, AG-ID |                        |        |                |                 |                                       |                |
|        |                                      | G1                                                      | All        | AMP                    |        |                |                 |                                       |                |
| 4CFH   | Rattus norvegicus                    | A1                                                      | All        | Staurosporine          | X-ray  | 3,24           | 2013            | Xiao et al. Nature, 2011              |                |
|        | Homo sapiens                         | B2                                                      | AG-ID      |                        |        |                |                 |                                       |                |
|        | Rattus norvegicus                    | G1                                                      | All        | AMP                    |        |                |                 |                                       |                |
| 4EAG   | Drosophila melanogaster              | EG:132E8.2 protein (A)                                  | B-ID       |                        | X-ray  | 2,7            | 2012            | Chen et al. Nat Struct Mol Biol, 2012 |                |
|        | Rattus norvegicus                    | B1                                                      | AG-ID      |                        |        |                |                 |                                       |                |
|        | Rattus norvegicus                    | G1                                                      | All        | ATP                    |        |                |                 |                                       |                |
| 4EAI   | Rattus norvegicus (synthetic linker) | A1                                                      | B-ID       |                        | X-ray  | 2,29           | 2012            | Chen et al. Nat Struct Mol Biol, 2012 |                |
|        | Homo sapiens                         | B2                                                      | AG-ID      |                        |        |                |                 |                                       |                |
|        | Rattus norvegicus                    | G1                                                      | All        | AMP                    |        |                |                 |                                       |                |

**Table 1 (end): List of all available AMPK or AMPK yeast ortholog structures.**

| PDB ID | Organism                             | Subunit | Domain       | Ligand                     | Method | Resolution (Å) | Deposition Year | Author                                | Remark        |
|--------|--------------------------------------|---------|--------------|----------------------------|--------|----------------|-----------------|---------------------------------------|---------------|
| 4EAJ   | Rattus norvegicus (synthetic linker) | A1      | B-ID         |                            | X-ray  | 2,61           | 2012            | Chen et al. Nat Struct Mol Biol, 2012 | Soaked        |
|        | Homo sapiens                         | B2      | AG-ID        |                            |        |                |                 |                                       |               |
|        | Rattus norvegicus                    | G1      | All          | AMP, ATP                   |        |                |                 |                                       |               |
| 4EAK   | Rattus norvegicus (synthetic linker) | A1      | B-ID         |                            | X-ray  | 2,5            | 2012            | Chen et al. Nat Struct Mol Biol, 2012 |               |
|        | Rattus norvegicus                    | B1      | AG-ID        |                            |        |                |                 |                                       |               |
|        | Rattus norvegicus                    | G1      | All          | ATP                        |        |                |                 |                                       |               |
| 4EAL   | Rattus norvegicus (synthetic linker) | A1      | B-ID         |                            | X-ray  | 2,51           | 2012            | Chen et al. Nat Struct Mol Biol, 2012 | Soaked        |
|        | Rattus norvegicus                    | B1      | AG-ID        |                            |        |                |                 |                                       |               |
|        | Rattus norvegicus                    | G1      | All          | AMP                        |        |                |                 |                                       |               |
| 4F2L   | Rattus norvegicus                    | A1      | AID          |                            | X-ray  | 1,5            | 2012            | Chen et al. Nature, 2013              |               |
| 4QFG   | Rattus norvegicus                    | A1      | All          | Staurosporine              | X-ray  | 3,46           | 2014            | Calabrese et al. Structure, 2014      |               |
|        |                                      | B1      | CBM, AG-ID   |                            |        |                |                 |                                       |               |
|        |                                      | G1      | All          | AMP                        |        |                |                 |                                       |               |
| 4QFR   | Rattus norvegicus                    | A1      | All          | Cl-A769662, Staurosporine  | X-ray  | 3,34           | 2014            | Calabrese et al. Structure, 2014      |               |
|        |                                      | B1      | CBM, AG-ID   |                            |        |                |                 |                                       |               |
|        |                                      | G1      | All          | AMP, ADP                   |        |                |                 |                                       |               |
| 4QFS   | Rattus norvegicus                    | A1      | All          | Br2-A769662, Staurosporine | X-ray  | 3,55           | 2014            | Calabrese et al. Structure, 2014      |               |
|        |                                      | B1      | CBM, AG-ID   |                            |        |                |                 |                                       |               |
|        |                                      | G1      | All          | AMP, ADP                   |        |                |                 |                                       |               |
| 4RED   | Homo sapiens                         | A1      | KD-AID       |                            | X-ray  | 2,95           | 2014            | Li et al. Cell Res, 2015              | Mutation K43A |
| 4RER   | Homo sapiens                         | A1      | All          | Staurosporine              | X-ray  | 4,05           | 2014            | Li et al. Cell Res, 2015              |               |
|        |                                      | B2      | CBM, AG-ID   | BCD                        |        |                |                 |                                       |               |
|        |                                      | G1      | All          | AMP                        |        |                |                 |                                       |               |
| 4REW   | Homo sapiens                         | A1      | All          | Staurosporine              | X-ray  | 4,58           | 2014            | Li et al. Cell Res, 2015              |               |
|        |                                      | B2      | (CBM), AG-ID |                            |        |                |                 |                                       |               |
|        |                                      | G1      | All          | AMP                        |        |                |                 |                                       |               |
| 4YOG   | Rattus norvegicus                    | B2      | CBM          |                            | NMR    | X              | 2015            | Mobbs et al. Biochem J, 2015          |               |
| 4YEE   | Rattus norvegicus                    | B2      | CBM          | GBCD                       | NMR    | X              | 2015            | Mobbs et al. Biochem J, 2015          |               |
| 4YEF   | Rattus norvegicus                    | B1      | CBM          | GBCD                       | NMR    | X              | 2015            | Mobbs et al. Biochem J, 2015          |               |

In subunit, A, B and G refer to subunits  $\alpha$ ,  $\beta$ , and  $\gamma$  respectively, while the same letters in brackets refer to the corresponding mammalian ortholog subunit. In domains, the mention All means that most of the subunit structure was resolved and other abbreviations are: CBM, carbohydrate-binding module; KD, kinase domain; AID, auto-inhibitory domain; B-ID,  $\alpha\beta$ -interaction domain; AG-ID,  $\alpha\beta\gamma$ -interaction domain; CBS: cystathione  $\beta$ -synthase. In ligands, BCD and GBCD refer to  $\beta$ -cyclodextrin and glucosyl- $\beta$ -cyclodextrin. In publication, Acta Cryst D and Acta Cryst F refer to Acta Crystallographica Section D and F respectively; Cell Metab to Cell Metabolism; Nat Comm to Nature Communications; Nat Struct Mol Biol to Nature Structural & Molecular Biology; Cell Res to Cell Research and Biochem J to Biochemical Journal.
